# Supplementary material for: Chemical site-selective prenylation of proteins
Source: Royal Society of Chemistry journal article supplement (doi:10.1039/b802199f), 2008-05-02

## Chemical Site-Selective Prenylation of Proteins

David P. Gamblin, Sander I. van Kasteren, Gonalo J. L. Bernardes, Justin M.

Chalker, Neil J. Oldham, Antony J. Fairbanks, Benjamin G. Davis\*

*Chemistry Research Laboratory, Dept. of Chemistry, University of Oxford  
Mansfield Road, OX1 3TA Oxford, UK*

[Ben.Davis@chem.ox.ac.uk](mailto:Ben.Davis@chem.ox.ac.uk)

### Table of Contents

|                                                         | Page |
|---------------------------------------------------------|------|
| General Procedures                                      | S2   |
| General procedure for the preparation of allylic thiols | S4   |
| Pre-activation of Tagged Mutant Protein                 | S5   |
| Procedure for Protein Prenylation                       | S5   |
| Protein Activity Assay                                  | S7   |
| Spectral Data                                           | S8   |

*General procedures*

Proton nuclear magnetic resonance ( $\delta_{\text{H}}$ ) spectra were recorded on a Bruker AV400 (400 MHz) or Bruker AV200 (200 MHz). Carbon nuclear magnetic resonance ( $\delta_{\text{C}}$ ) spectra were recorded on a Bruker AV400 (100.7 MHz) spectrometer. Spectra were fully assigned using COSY and HMQC; multiplicities were assigned using DEPT 135. All chemical shifts are quoted on the  $\delta$  scale in ppm using residual solvent as the internal standard ( $^1\text{H}$  NMR:  $\text{CDCl}_3 = 7.26$ ;  $^{13}\text{C}$  NMR:  $\text{CDCl}_3 = 77.0$ ). The following splitting abbreviations were used: s = singlet, d = doublet, t = triplet, q = quartet, a = apparent.

Infrared spectra were recorded on a Bruker Tensor 27 Fourier Transform spectrophotometer using thin films on NaCl plates for oils. Absorption maxima ( $\nu_{\text{max}}$ ) are reported in wavenumbers ( $\text{cm}^{-1}$ ) and classified as strong (s) or broad (br).

Low resolution mass spectra were recorded on a Micromass Platform 1 spectrometer using electrospray ionization (ESI) or by Mr. Robin Proctor using a Walters 2790-Micromass LCT electrospray ionization mass spectrometer. High resolution mass spectra were recorded by Mr. Robin Proctor on a Walters 2790-Micromass LCT electrospray ionization mass spectrometer.  $m/z$  values are reported in Daltons.

Thin layer chromatography (TLC) was carried out using Merck aluminium backed sheets coated with 60F<sub>254</sub> silica gel. Visualization of the silica plates was achieved using a UV lamp ( $\lambda_{\text{max}} = 254$  nm) and potassium permanganate (5% in 1M NaOH). Flash column chromatography was carried out using BDH PROLAB® 40-63 mm silica gel (VWR).

Anhydrous solvents were purchased from Fluka or Acros. All other solvents were used as supplied (Analytical or HPLC grade), without prior purification. Milli-Q water for protein modifications. Reagents were purchased from Aldrich and used as supplied. 'Petrol' refers to the fraction of light petroleum ether boiling in the range 40-60 °C. All reactions using anhydrous conditions were performed using flame-dried apparatus under an atmosphere of argon.

*Protein Mass Spectrometry:* Liquid chromatography-mass spectrometry (LC-MS) was performed on a Micromass LCT (ESI-TOF-MS) coupled to a Waters Alliance 2790

HPLC using a Phenomenex Jupiter C4 column (250 x 4.6 mm x 5 $\mu$ m). Water:acetonitrile, 95:5 (solvent A) and acetonitrile (solvent B), each containing 0.1% formic acid, were used as the mobile phase at a flow rate of 1.0 mL min<sup>-1</sup>. The gradient was programmed as follows: 5% B, 3 min isocratic, then gradient to 100% B over 16 min, then isocratic at 100% B for 2 min. The electrospray source of LCT was operated with a capillary voltage of 3.2 kV and a cone voltage of 25 V. Nitrogen was used as the nebulizer and desolvation gas at a total flow of 600 L hr<sup>-1</sup>. Spectra were calibrated using a calibration curve constructed from a minimum of 17 matched peaks from the multiply charged ion series of equine myoglobin, which was also obtained at a cone voltage of 25V. Total mass spectra were reconstructed from the ion series using the MaxEnt algorithm preinstalled on MassLynx software (v. 4.0 from Waters) according to manufacturer's instructions.

### General Procedure for the Preparation of Allylic Thiols

The substrate was dissolved in anhydrous toluene (2 mL for a 200 mg scale reaction). Lawesson's reagent (0.6 equivalents) was added, and the reaction mixture heated to 80 °C under an atmosphere of argon for the indicated reaction time. After this time the reaction mixture was cooled to room temperature and purified directly by flash column chromatography (petrol→petrol:ethyl acetate; 95:5).

### 3-Methyl-1-thio-cyclohex-2-ene **2**

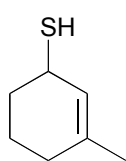

Using the general procedure, **2** was prepared from 3-methyl-cyclohex-2-ene-1-ol **1** (16 hour reaction time) and isolated as a yellow oil on a 3.80 mmol scale; Yield: 71%;  $R_f$  0.8 (petrol:ethyl acetate, 95:5);  $\nu_{\max}$  (thin film) 2305 (br, SH) 1440 (s, C=C)  $\text{cm}^{-1}$ ;  $\delta_H$  (400 MHz,  $\text{CDCl}_3$ ) 1.64-1.69 (6H, m), 1.88-1.97 (4H, m), 3.53-3.56 (1H, m,  $\text{CHSH}$ ), 5.46-5.47 (1H, m,  $=\text{CH}$ );  $\delta_C$  (100.7 MHz,  $\text{CDCl}_3$ ) 19.7, 23.7, 29.6, 33.1, 35.6, 124.8, 135.9;  $m/z$  (FI) 254 [2M]; HRMS (FI) Calcd. for  $\text{C}_{14}\text{H}_{22}\text{S}_2$  254.1163. Found: 254.1174.

### *trans*-Geranylmercaptan<sup>1</sup> **4**

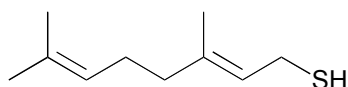

Using the general procedure, **4** was prepared from *trans*-geraniol **3** (22 hour reaction time) and isolated as an oil on a 0.94 mmol scale; Yield: 72%;  $R_f$  0.8 (petrol:ethyl acetate, 9:1);  $\nu_{\max}$  (thin film) 2564 (br, SH) 1462 (s, C=C)  $\text{cm}^{-1}$ ;  $\delta_H$  (400 MHz,  $\text{CDCl}_3$ ) 1.41 (1H, t,  $J$  7.0 Hz, SH), 1.60, 1.66, 1.69 (9H, 3 x s, 3 x  $\text{CH}_3$ ), 1.96-2.11 (4H, m, 2 x  $\text{CH}_2$ ), 3.17 (2H, at,  $J$  7.3 Hz,  $\text{CH}_2\text{SH}$ ), 5.10 (1H, m,  $\text{CH}=\text{C}$ ), 5.35 (1H, dt,  $J_{\text{vic}}$  7.8 Hz,  $J$  1.2 Hz,  $\text{CHCH}_2\text{SH}$ );  $\delta_C$  (100.7 MHz,  $\text{CDCl}_3$ ) 15.8, 15.9, 16.0, 22.1, 39.2, 39.7, 123.7, 124.3;  $m/z$  (ESI) 363 [2M+Na]<sup>+</sup>.

NOTE: If the reaction was worked up after 3 hours of reaction time, **4** was isolated along with the allylic isomer shown below in a 87:13 ratio. With prolonged heating (20+ hours), this isomer was not observed.

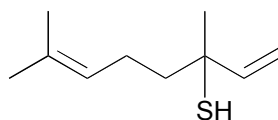

<sup>1</sup> J. A. Maddry, N. Bansal, L. E. Bermudez, R. N. Comber, I. M. Orme, W. J. Suling, L. N. Wilson and R. C. Reynolds, *Bioorg. Med. Chem. Lett.*, 1998, **8**, 237-242.

***trans,trans*-Farnesylmercaptan<sup>2</sup> 6**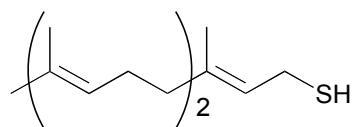

Using the general procedure, **6** was prepared from *trans,trans*-farnesol **5** (6 hours reaction time) and isolated as a yellow oil along with 7% inseparable allylic isomer; 0.91 mmol scale; Yield: 84%;  $R_f$  0.9 (petrol:ethyl acetate, 9:1);  $\nu_{\max}$  (thin film) 2453 (br, SH) 1476 (s, C=C)  $\text{cm}^{-1}$ ;  $\delta_H$  (400 MHz,  $\text{CDCl}_3$ ) 1.40 (1H, t,  $J$  7.0 Hz, SH), 1.61, 1.66, 1.68 (12H, 3 x s, 4 x  $\text{CH}_3$ ) 1.99-2.08 (8H, m, 4 x  $\text{CH}_2$ ), 3.17 (2H, at,  $J$  7.4 Hz,  $\text{CH}_2\text{SH}$ ), 5.06-5.14 (2H, m, 2 x  $\text{CH}=\text{C}$ ), 5.35 (1H, dt,  $J_{\text{vic}}$  7.8 Hz,  $J$  1.2 Hz,  $\text{CHCH}_2\text{SH}$ );  $m/z$  (ESI) 237  $[\text{M}-\text{H}]^-$ .

***trans,trans,trans*-Geranylgeranylmercaptan<sup>2</sup> 8**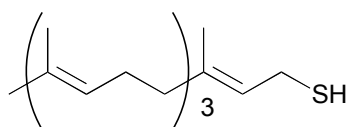

Using the general procedure, **8** was prepared from *trans,trans,trans*-geranyl geraniol **7** (6 hours reaction time) and isolated as a yellow oil along with 4% inseparable allylic isomer; 0.91 mmol scale; Yield: 91%;  $R_f$  0.9 (petrol:ethyl acetate, 9:1);  $\nu_{\max}$  (thin film) 2397 (br, SH) 1444 (s, C=C)  $\text{cm}^{-1}$ ;  $\delta_H$  (200 MHz,  $\text{CDCl}_3$ ) 1.40 (1H, t,  $J$  7.0 Hz, SH), 1.61, 1.66, 1.69 (15H, 3 x s, 5 x  $\text{CH}_3$ ) 2.02-2.08 (12H, m, 6 x  $\text{CH}_2$ ), 3.17 (2H, at,  $J$  7.4 Hz,  $\text{CH}_2\text{SH}$ ), 5.08-5.15 (3H, m, 3 x  $\text{CH}=\text{C}$ ), 5.35 (1H, dt,  $J_{\text{vic}}$  7.5 Hz,  $J$  1.1 Hz,  $\text{CHCH}_2\text{SH}$ );  $m/z$  (ESI) 305  $[\text{M}-\text{H}]^-$ .

**Pre-activation of Tagged Mutant Protein**

SBL-S156C mutant (2 mg) was dissolved in degassed aqueous buffer solution (1 mL, 70 mM CHES, 5 mM MES, 2 mM  $\text{CaCl}_2$ , pH 9.5). A solution of phenyl selenenyl bromide (5 mg, 0.02 mmol) in acetonitrile (200  $\mu\text{L}$ ) was added, along with irreversible inhibitor phenyl methylsulfonyl fluoride (PMSF) (650  $\mu\text{L}$  of a 15 mg/mL solution in acetonitrile), to the protein solution and placed on an end-over-end rotator. After 30 min, the reaction mixture was loaded onto a PD10 Sephadex® G25 column pre-equilibrated with the above buffer. The protein fraction was analyzed by LC-mass spectrometry revealing formation of the pre-activated tagged mutant protein (calculated mass, 27026; observed mass, 27024).

**Procedure for Protein Prenylation**

Prenyl thiol (100 equivalents) was dissolved in DMSO (250  $\mu\text{L}$ ) and added to a solution of the pre-activated protein (1 mg) in aqueous buffer solution (1 mL, 70 mM

<sup>2</sup> W. W. Epstein, Z. Wang, *Chem. Commun.*, 1997, 863-864.

CHES, 5 mM MES, 2 mM CaCl<sub>2</sub>, pH 9.5). The mixture was sonicated for 2 h in 10 minute pulses (10 minutes on, 10 minutes off) at room temperature. The mixture was centrifuged and analyzed by LC-mass spectrometry, revealing formation of the disulfide-linked prenylated protein.

| Thiol    | Product   | ESI-MS<br>Theor. | Mass<br>Found | Yield |
|----------|-----------|------------------|---------------|-------|
| Geranyl  | <b>10</b> | 27037            | 27042         | 90%   |
| Farnesyl | <b>11</b> | 27105            | 27110         | 50%   |

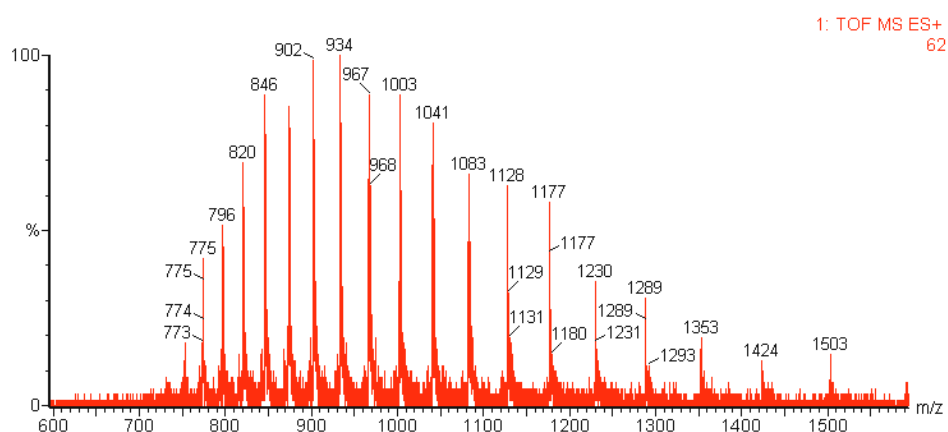

**Figure 1.** ESI-MS spectrum of SBL-geranyl **10**.

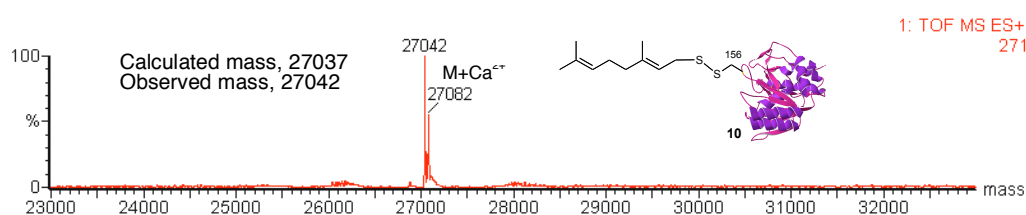

**Figure 2.** Deconvoluted ESI-MS spectrum of SBL-geranyl **10**.

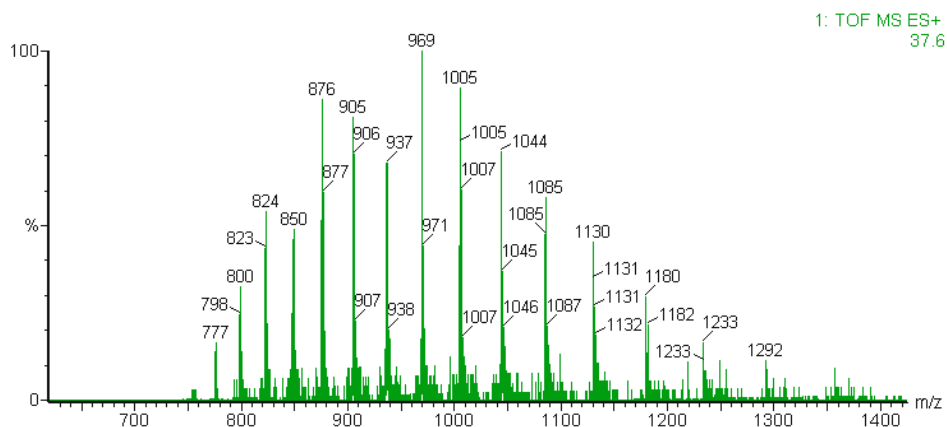

**Figure 3.** ESI-MS spectrum of SBL-farnesyl **11**.

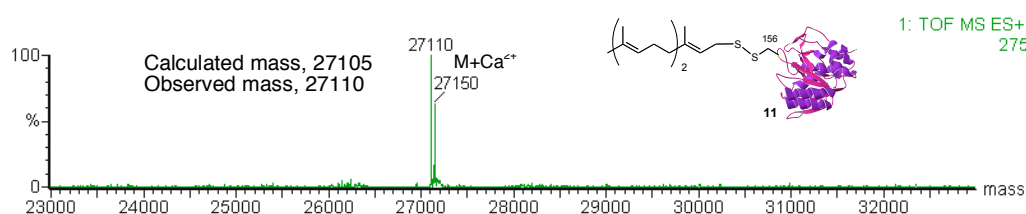

**Figure 4.** Deconvoluted ESI-MS spectrum of SBL-farnesyl **11**.

### Protein Activity Assay

Disulfide-linked geranyl SBL was prepared as described above (phenyl selenyl bromide activation then sonication with geranyl thiol, 20% DMSO) with the exception that the inhibitor PMSF was not used to deactivate the enzyme. A 200  $\mu$ L aliquot of the prenylated protein was diluted with the same buffer to a final concentration of 0.2 mg/mL and 475  $\mu$ L was transferred to a plastic micro-centrifuge tube. A solution of suc-AAPF-pNA (25  $\mu$ L of a 0.20 M solution in DMSO) was added to the protein solution. A bright yellow product was formed immediately, indicating enzymatic activity (Figure 5).

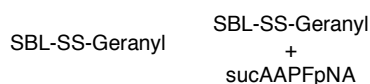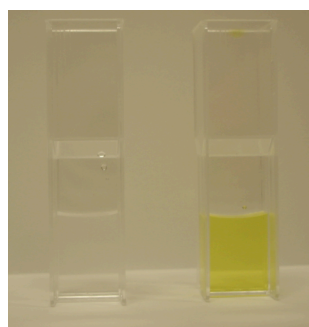

**Figure 5.** Activity assay post-prenylation

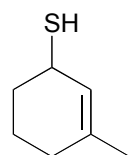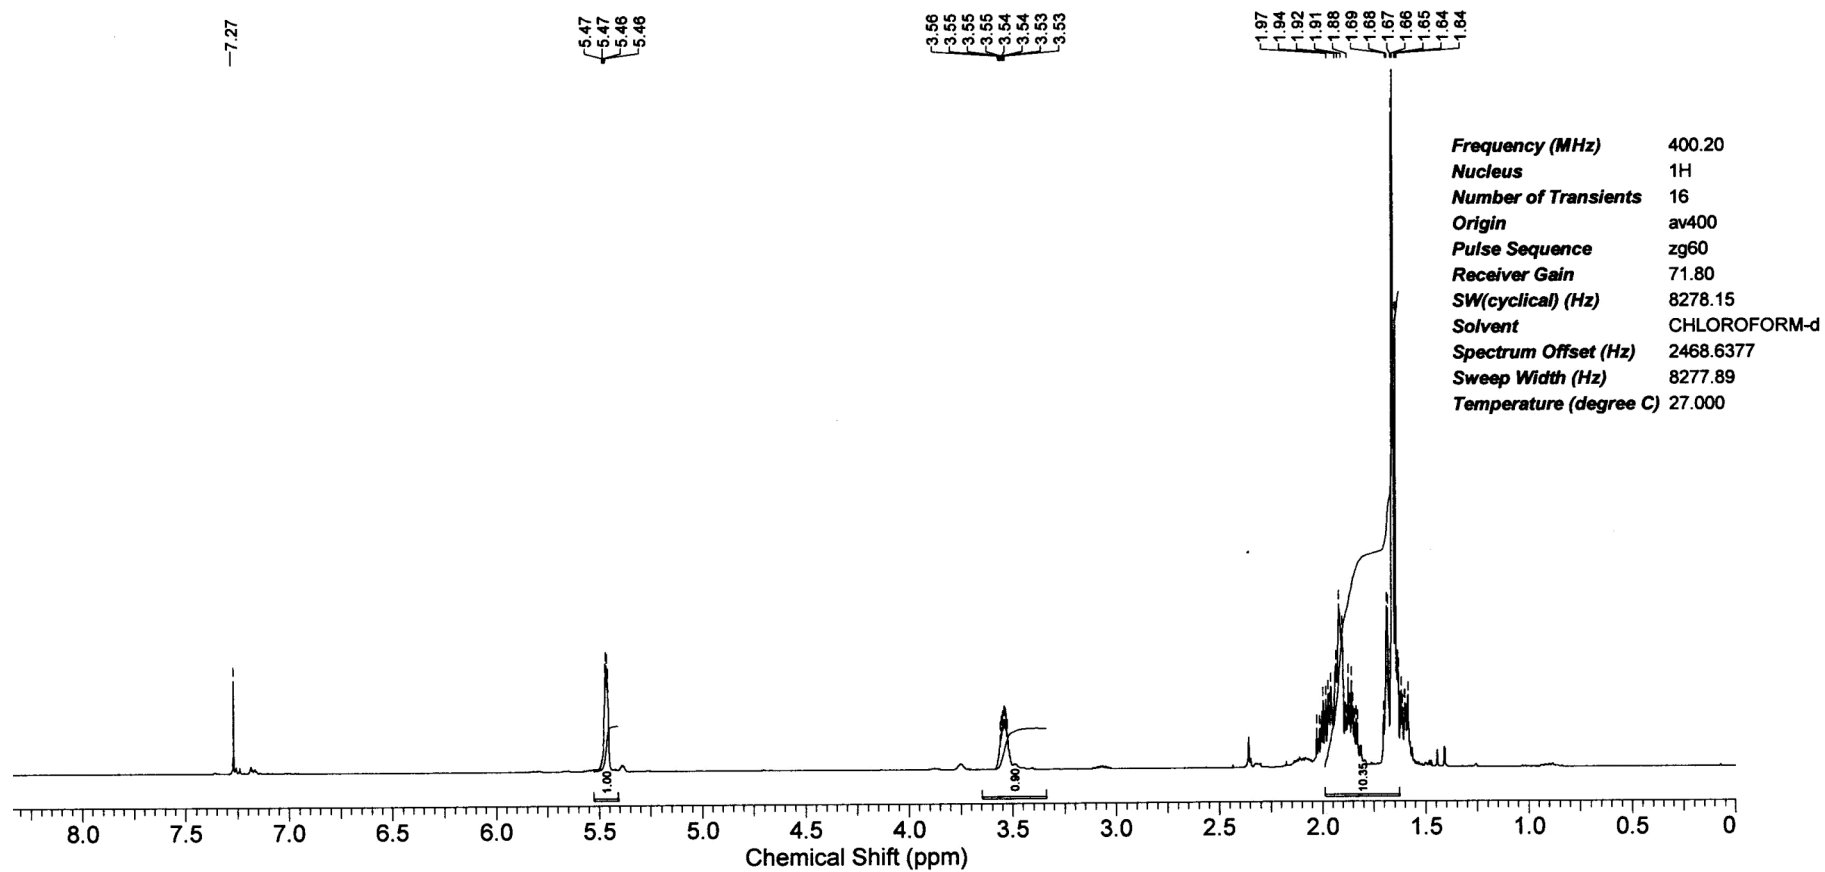

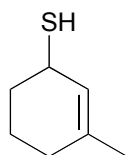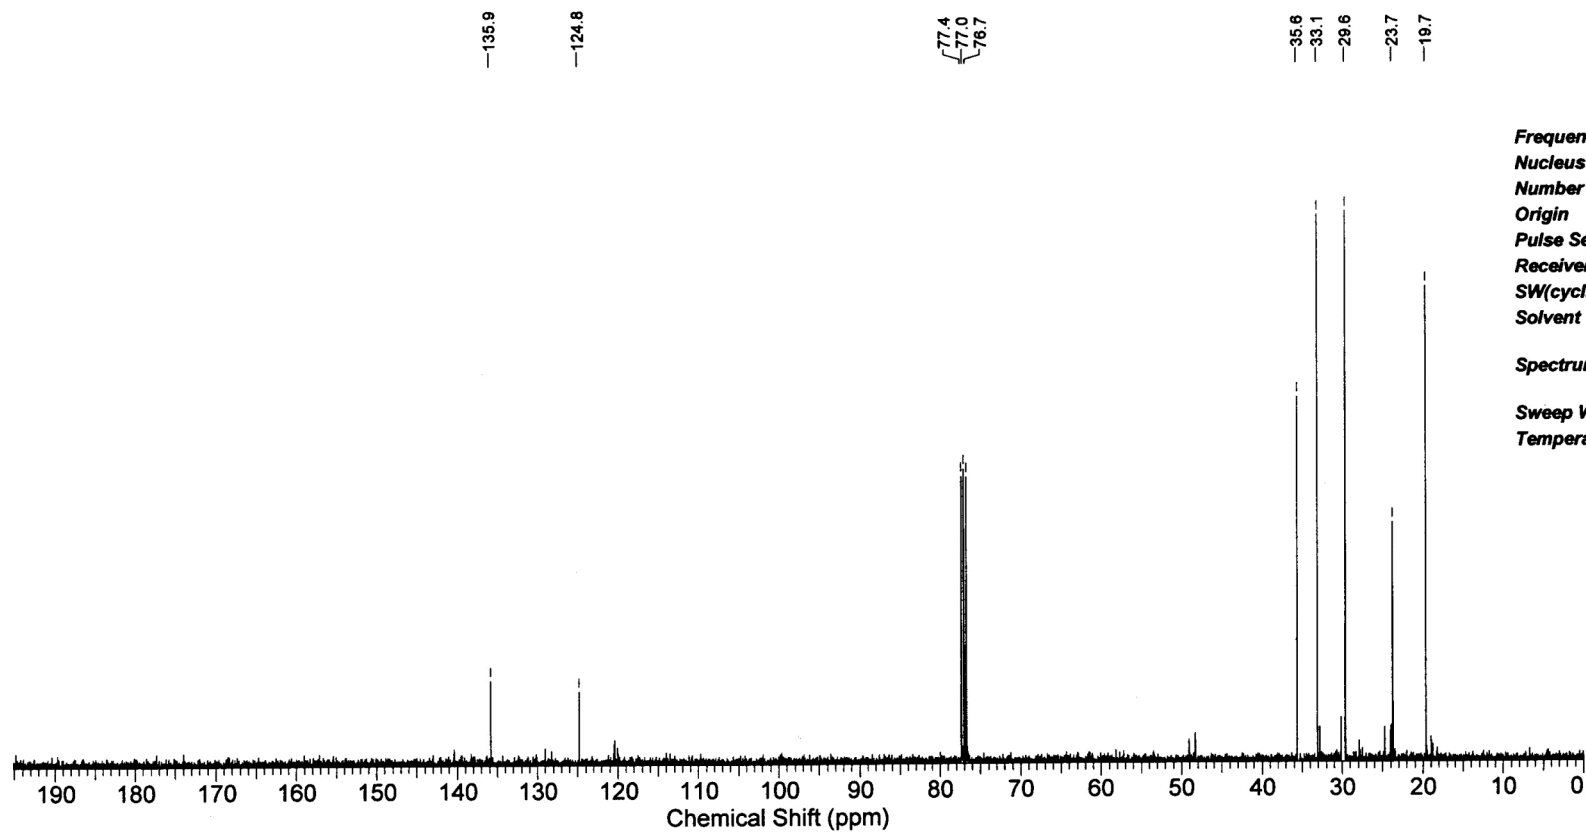

**Frequency (MHz)** 100.64  
**Nucleus** <sup>13</sup>C  
**Number of Transients** 256  
**Origin** av400  
**Pulse Sequence** zgpg30  
**Receiver Gain** 32768.00  
**SW(cyclical) (Hz)** 26178.01  
**Solvent** CHLORO  
FORM-d  
**Spectrum Offset (Hz)** 10023.59  
47  
**Sweep Width (Hz)** 26176.41  
**Temperature (degree C)** 27.000

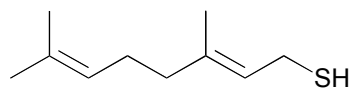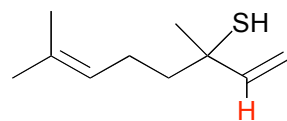

(3 hour reaction time)

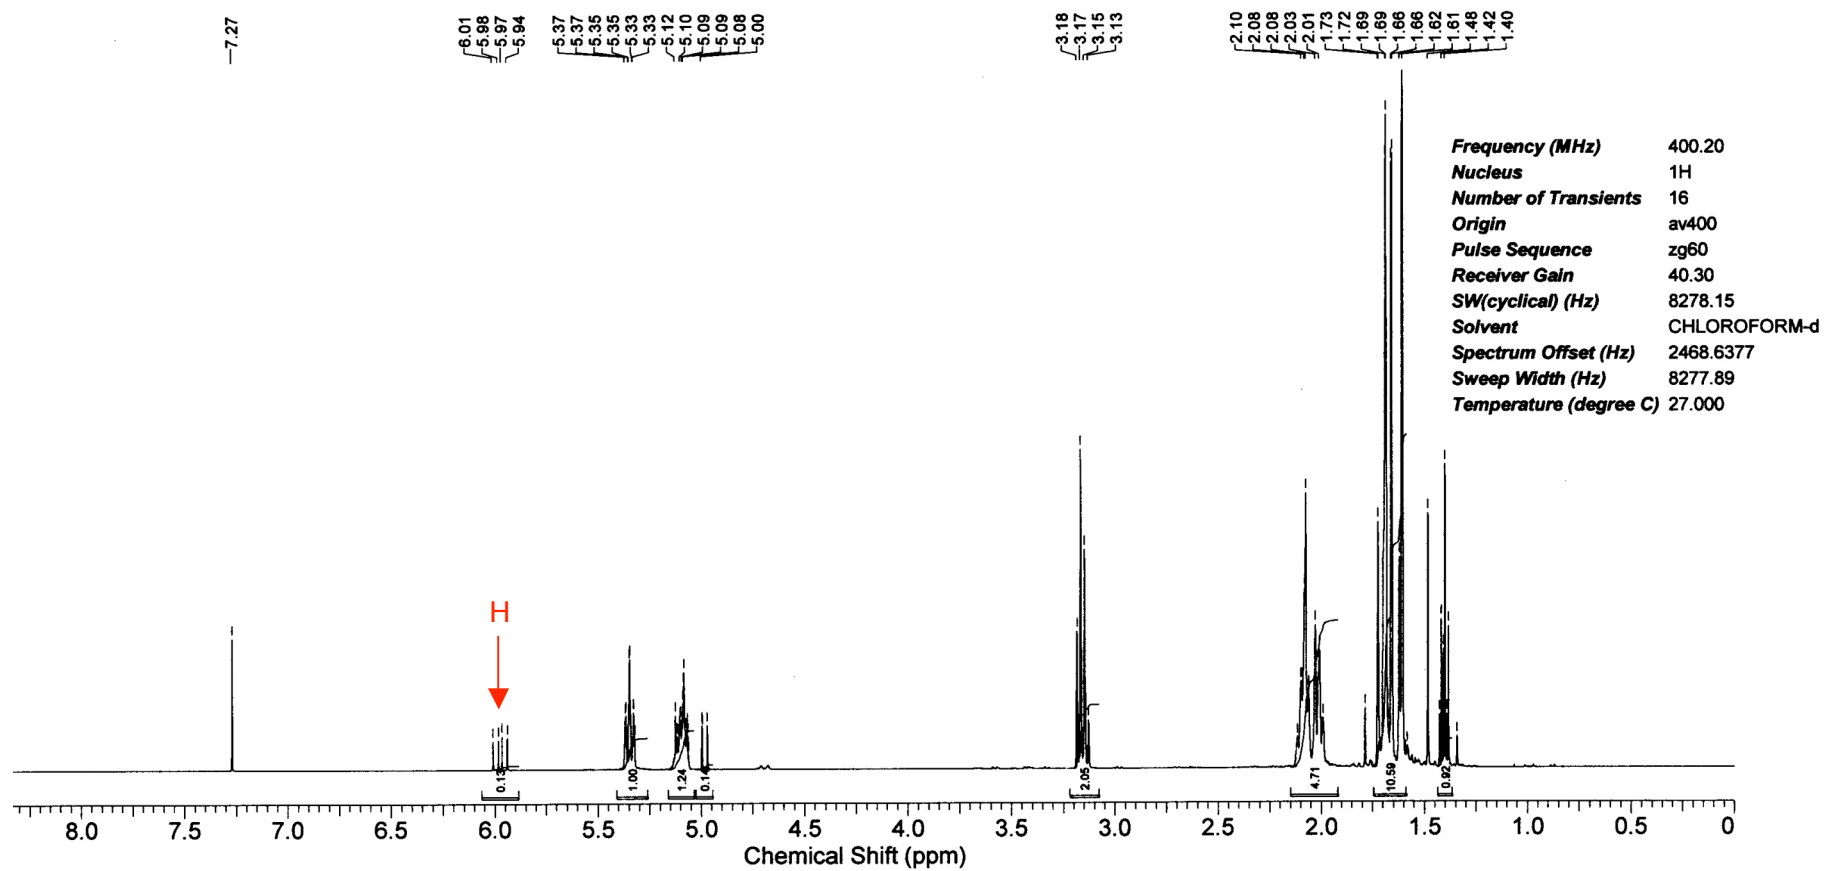

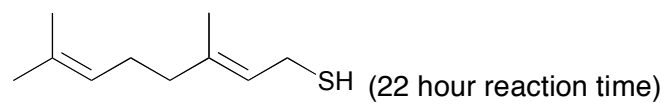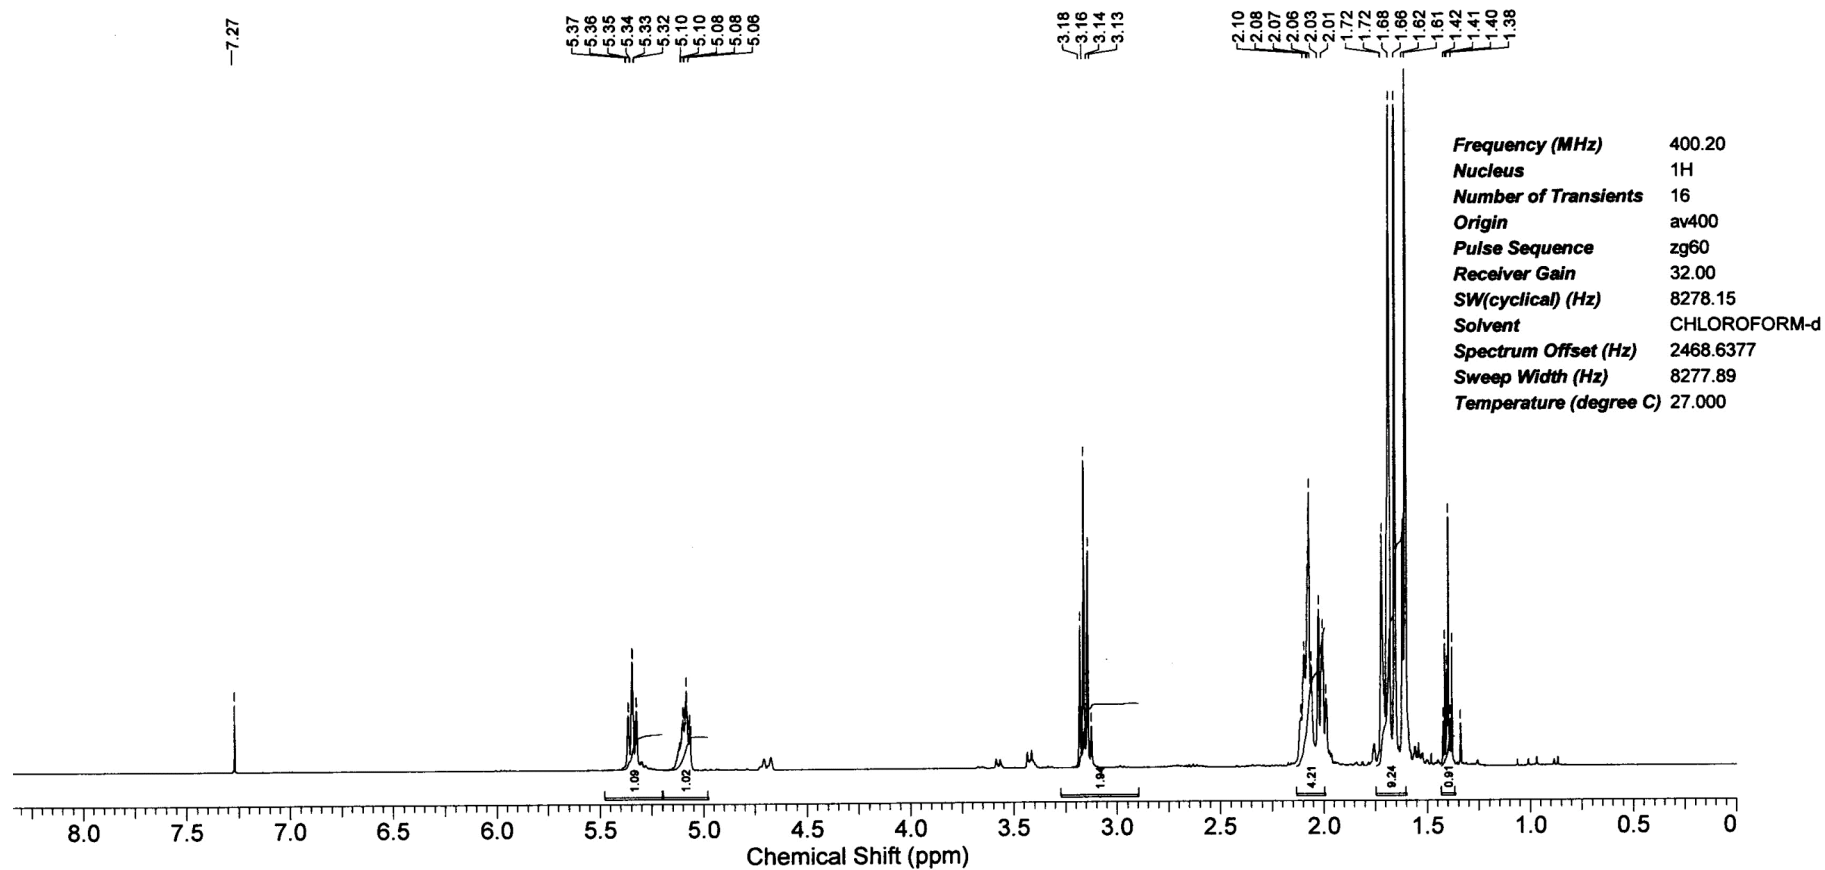

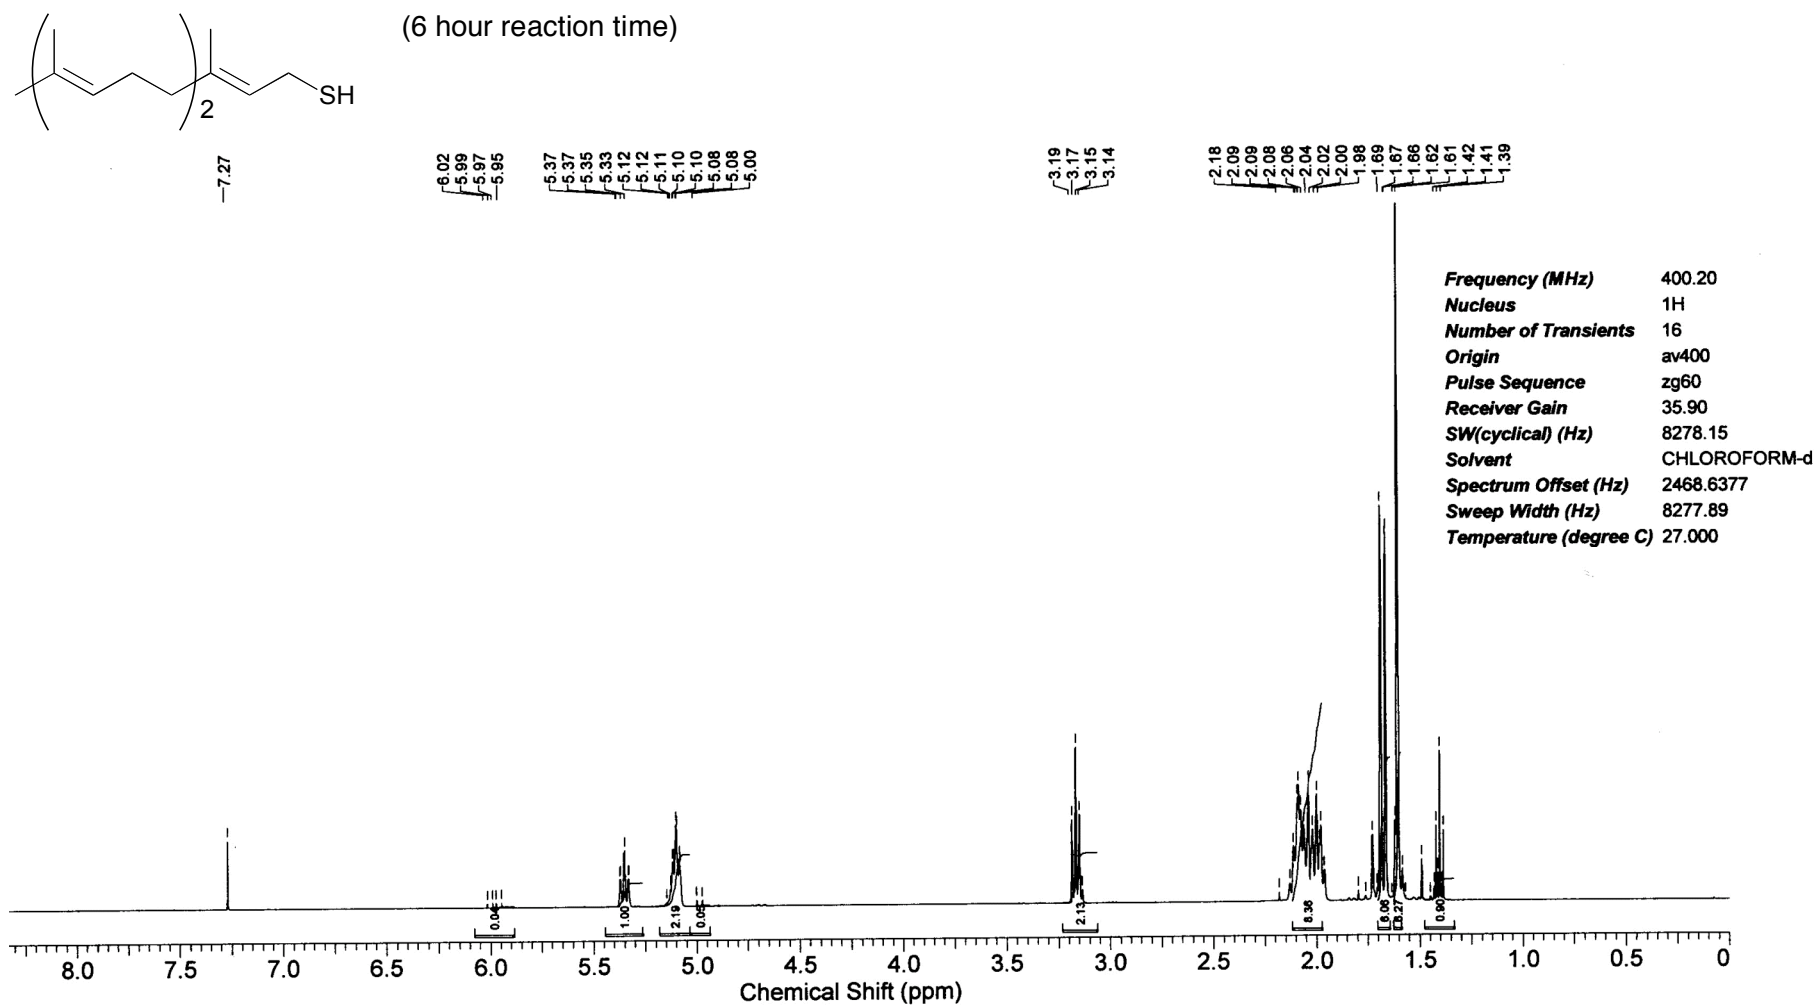

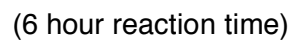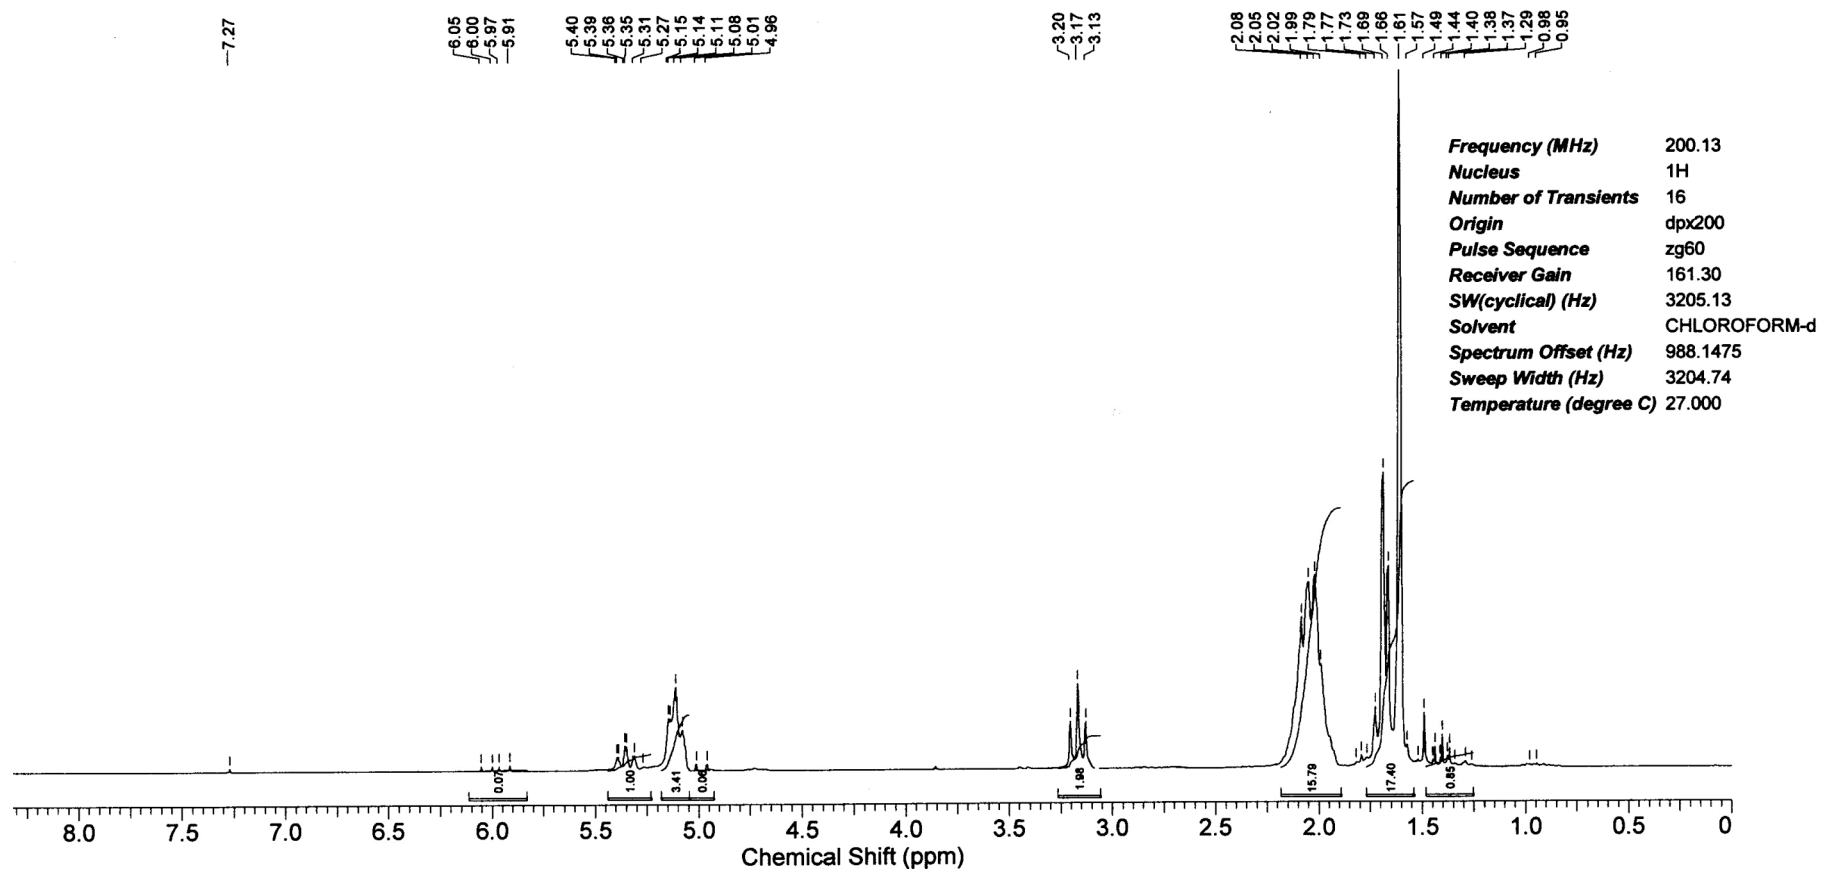

Supplement: b802199f.pdf [file b802199f.pdf]
